# Supplementary material for: A Novel Variable Selection Method Based on Ordered Predictors Selection and Successive Projections Algorithm for Predicting Gastrodin Content in Fresh Gastrodia elata Using Fourier Transform Near-Infrared Spectroscopy and Chemometrics
Source: MDPI journal article supplement (doi:10.3390/foods12244435), 2023-12-11
Supplement: s1 [file s1]

## Supplementary Materials

### Figure caption:

**Figure S1.** The RGB image of *G. elata*.

**Figure S2.** HPLC chromatogram of *G. elata* samples (No.1-50).

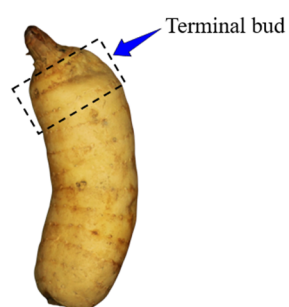

**Figure S-1**

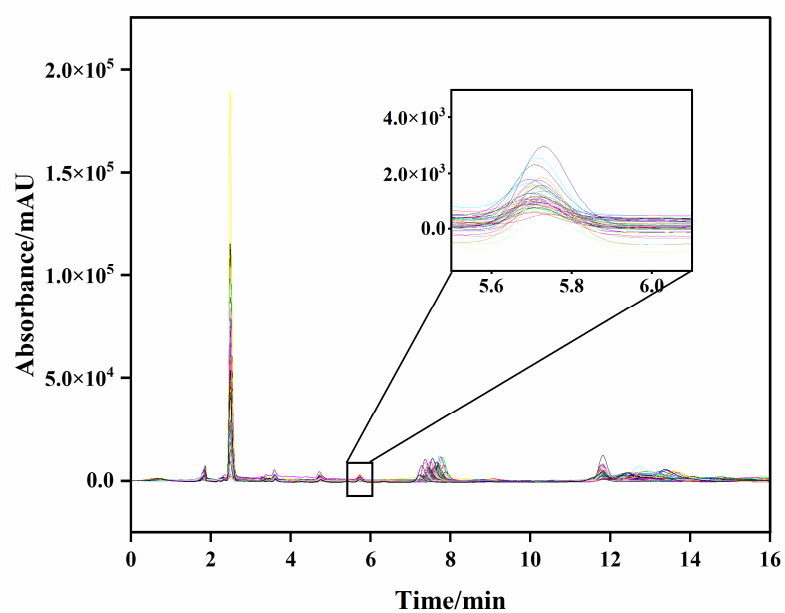

**Figure S-2**
